# Supplementary material
Source: Springer Nature journal article supplement (https://www.springermedizin.de/resource/supplementary/12985_2010_1023_MOESM9_ESM.pdf/9608968)

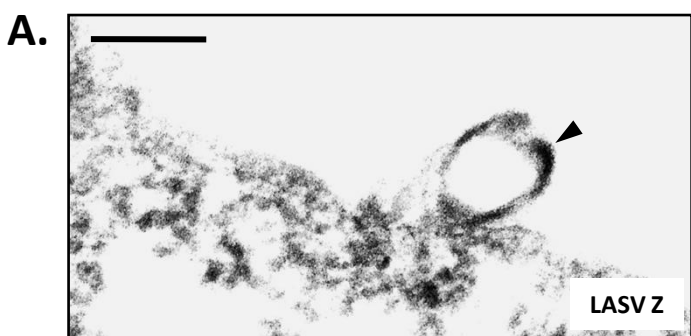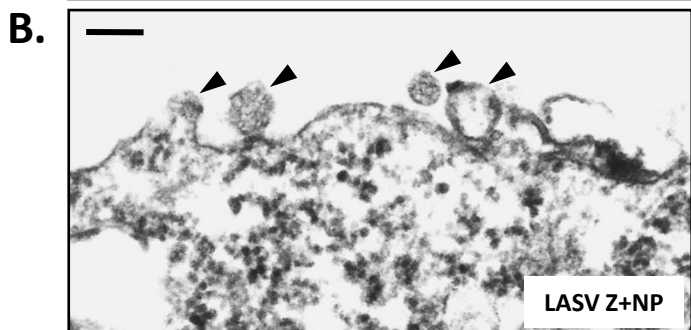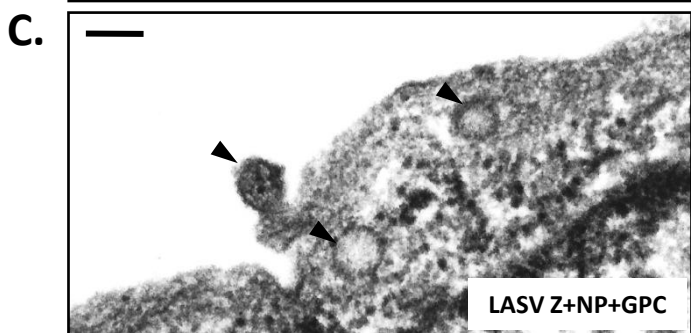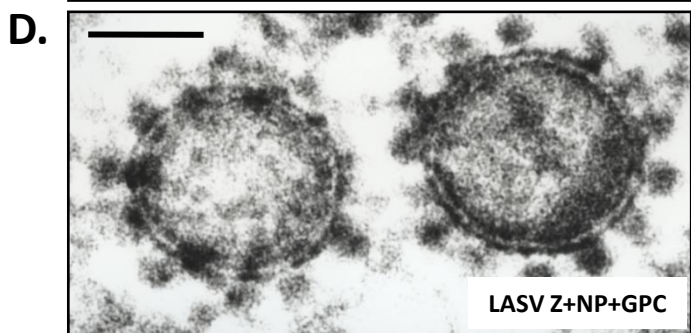

bar = 100 nm

Supplement: MOESM9 [file 9608968]
